CORRECTION

## Correction: Strategies to increase adoption of animal vaccines by smallholder farmers with focus on neglected diseases and marginalized populations

The *PLOS Neglected Tropical Diseases* Staff

There is an error in [Table 2](#). In the far-right column, the phrases “Access,” “Demand,” “Access and Demand,” and “Access and Demand combined” should all be in bold. The publisher apologizes for this error. Please see the correct [Table 2](#) here.

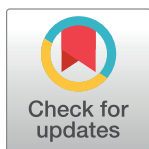

### OPEN ACCESS

**Citation:** The *PLOS Neglected Tropical Diseases* Staff (2019) Correction: Strategies to increase adoption of animal vaccines by smallholder farmers with focus on neglected diseases and marginalized populations. *PLoS Negl Trop Dis* 13 (3): e0007279. <https://doi.org/10.1371/journal.pntd.0007279>

**Published:** March 18, 2019

**Copyright:** © 2019 The PLOS Neglected Tropical Diseases Staff. This is an open access article distributed under the terms of the [Creative Commons Attribution License](#), which permits unrestricted use, distribution, and reproduction in any medium, provided the original author and source are credited.

**Table 2. Potential strategies to secure vaccine production and increase vaccine use by SHFs and/or MPs according to the different disease categories.**

| Group of diseases                                  | Strategies at manufacturing level                                                                                                                                                                       | Strategies to increase vaccine adoption by SHFs/MPs                                                                                                                                                                                                                                                                                                                                                                                                                                                                                                                                                                                                                                                                                                                                                                                                                                                                                                                                                                                                                                                                                                   |
|----------------------------------------------------|---------------------------------------------------------------------------------------------------------------------------------------------------------------------------------------------------------|-------------------------------------------------------------------------------------------------------------------------------------------------------------------------------------------------------------------------------------------------------------------------------------------------------------------------------------------------------------------------------------------------------------------------------------------------------------------------------------------------------------------------------------------------------------------------------------------------------------------------------------------------------------------------------------------------------------------------------------------------------------------------------------------------------------------------------------------------------------------------------------------------------------------------------------------------------------------------------------------------------------------------------------------------------------------------------------------------------------------------------------------------------|
| Cause economic losses also in developed countries  | Not applicable <sup>1</sup>                                                                                                                                                                             | <p><b>Access:</b></p> <ol style="list-style-type: none"> <li>1. Creation of access points: creation of a sustainable supply via rural retailers and local authorised vaccinators. Might include access to capital by local retailers.</li> <li>2. Establishment of community supply: vaccine supply through farmers associations and other community structures.</li> <li>3. Institution of prize mechanisms: prize mechanisms for distribution (assuming there is capital available).</li> </ol> <p><b>Demand:</b></p> <ol style="list-style-type: none"> <li>4. Increasing awareness of vaccine benefits and disease control programs: can include the development of vaccination programs.</li> <li>5. Increased vaccine value: multivalent vaccines, integration of vaccines to technical support packages</li> </ol> <p><b>Access and Demand combined:</b></p> <ol style="list-style-type: none"> <li>6. Technical considerations: small pack size and thermotolerance.</li> </ol>                                                                                                                                                               |
| Cause economic losses only in developing countries | <p><b>Availability:</b></p> <ul style="list-style-type: none"> <li>• Support local and regional vaccine manufacturers to ensure there is enough supply of quality vaccine.</li> </ul>                   | <p><b>Access and Demand:</b></p> <p>As above, but when the private sector is involved, it will be mainly local; therefore, strategies that require access to capital might not work or might be limited in scale.</p>                                                                                                                                                                                                                                                                                                                                                                                                                                                                                                                                                                                                                                                                                                                                                                                                                                                                                                                                 |
| Diseases controlled by governments                 | <p><b>Availability:</b></p> <ul style="list-style-type: none"> <li>• Support vaccine manufacturers to ensure there is enough supply of quality vaccine.</li> </ul>                                      | <p><b>Access and Demand:</b></p> <ol style="list-style-type: none"> <li>1. Implementation of government policies that promote the use of vaccines.</li> <li>2. Provide partially or fully subsidized vaccines only to SHFs/MPs and not to commercial farmers.</li> <li>3. Ensure vaccination policies promote cooperation amongst farmers and do not interfere with other vaccination strategies.</li> <li>4. Strengthening of the national veterinary services.</li> </ol>                                                                                                                                                                                                                                                                                                                                                                                                                                                                                                                                                                                                                                                                           |
| Neglected diseases                                 | <p><b>Availability:</b></p> <ul style="list-style-type: none"> <li>• Purchase guarantee (but this will not guarantee distribution or vaccine use).</li> <li>• Ensure demand for the vaccine.</li> </ul> | <p><b>Access:</b></p> <ol style="list-style-type: none"> <li>1. Creation of vaccine and antigen banks or stockpiles (strategic reserves).</li> </ol> <p><b>Demand:</b></p> <ol style="list-style-type: none"> <li>2. Transformation of public goods into private goods: combination vaccines, bundle products, expansion of label claims.</li> <li>3. Development of disease control guidelines and large-scale demonstrations: to encourage governments to take ownership and leadership.</li> <li>4. Demonstration of the benefit of neglected zoonotic disease control programs.</li> <li>5. Social participation and community engagement.</li> </ol> <p><b>Access and Demand combined:</b></p> <ol style="list-style-type: none"> <li>6. Integration with other animal health activities.</li> <li>7. Integration with human health sector providers and other human health interventions.</li> <li>8. Technical considerations: One-shot vaccines (very important to reach remote populations), thermotolerance, ease of application.</li> <li>9. Institution of prize mechanisms: to stimulate technological platforms of interest.</li> </ol> |

<sup>1</sup> Not considered to be a weakness in the vaccine supply chain.

**Abbreviations:** MPs, marginalized populations; SHFs, smallholder farmers.

<https://doi.org/10.1371/journal.pntd.0007279.t001>

## Reference

1. Donadeu M, Nwankpa N, Abela-Ridder B, Dungu B (2019) Strategies to increase adoption of animal vaccines by smallholder farmers with focus on neglected diseases and marginalized populations. PLoS Negl Trop Dis 13(2): e0006989. <https://doi.org/10.1371/journal.pntd.0006989> PMID: 30730883
